# Supplementary material
Source: publisher figshare collection journal article supplement (https://sage.figshare.com/ndownloader/files/15254831)
Supplement: Supplementary file 1 [file 15254831]

| Supplemental Table S1. | | | | | | | | | | | | | | | | | | | | | | | | | | | | | | |
| --- | --- | --- | --- | --- | --- | --- | --- | --- | --- | --- | --- | --- | --- | --- | --- | --- | --- | --- | --- | --- | --- | --- | --- | --- | --- | --- | --- | --- | --- | --- |
| *Pearson Correlations of Averaged Adversity Severity Ratings Controlling for Sibling Status* | | | | | | | | | | | | | | | | | | | | | | | | | | | | | | |
| Adversity Type | 1 | | 2 | | | | 3 | 4 | | | 5 | | 6 | 7 | | | 8 | | 9 | | 10 | | 11 | | 12 | 13 | | 14 | | |
| 1. DV |  | — | |  | .68 | ** | .86 | ** | .20 | * | .14 | * | -.10 |  | .20 | * | .13 |  | .12 |  | .24 | ** | .50 | ** | .14 |  | .07 |  | .01 |  |
| 2. Psych. IPV |  |  | |  | — |  | .67 | ** | .28 | ** | .08 |  | -.01 |  | .26 | ** | .24 |  | .18 |  | .34 | ** | .38 | ** | .12 |  | .04 |  | -.03 |  |
| 3. Phys. IPV |  |  | |  |  |  | — |  | .26 | * | .13 |  | -.06 |  | .17 | * | .23 | * | .13 |  | .18 |  | .52 | ** | .13 |  | .06 |  | .01 |  |
| 4. Psych. Abuse |  |  | |  |  |  |  |  | — |  | .48 | ** | .21 | * | .16 | * | .51 | ** | .12 |  | .19 | * | .19 | * | .04 |  | .17 |  | .18 |  |
| 5. Phys. Abuse |  |  | |  |  |  |  |  |  |  | — |  | .10 |  | -.01 |  | .14 |  | .04 |  | .24 |  | .06 |  | .20 | * | .20 |  | .17 |  |
| 6. Sex Abuse |  |  | |  |  |  |  |  |  |  |  |  | — |  | .00 |  | .13 |  | .01 |  | -.01 |  | -.07 |  | -.06 |  | .08 |  | -.01 |  |
| 7. Neglect |  |  | |  |  |  |  |  |  |  |  |  |  |  | — |  | .24 | * | .45 | ** | .05 | ** | .34 | ** | .17 |  | .03 |  | .29 | ** |
| 8. Loss |  |  | |  |  |  |  |  |  |  |  |  |  |  |  |  | — |  | .23 |  | .05 |  | .34 | ** | .13 |  | .11 |  | .14 |  |
| 9. CG Sub. |  |  | |  |  |  |  |  |  |  |  |  |  |  |  |  |  |  | — |  | .10 |  | .32 | ** | .19 |  | .06 |  | .18 | * |
| 10. Suicidality |  |  | |  |  |  |  |  |  |  |  |  |  |  |  |  |  |  |  |  | — |  | .11 |  | .00 |  | .09 |  | -.08 |  |
| 11. Criminality |  |  | |  |  |  |  |  |  |  |  |  |  |  |  |  |  |  |  |  |  |  | — |  | .11 |  | -.14 |  | -.03 |  |
| 12. CV |  |  | |  |  |  |  |  |  |  |  |  |  |  |  |  |  |  |  |  |  |  |  |  | — |  | -.04 |  | .00 |  |
| 13. Sex Assault |  |  | |  |  |  |  |  |  |  |  |  |  |  |  |  |  |  |  |  |  |  |  |  |  |  | — |  | .10 |  |
| 14. Health |  |  | |  |  |  |  |  |  |  |  |  |  |  |  |  |  |  |  |  |  |  |  |  |  |  |  |  | — |  |
| *Note.* CG Sub. = Caregiver Substance Abuse, CV = Community Violence, DV = Domestic Violence, Health = Health-related Trauma, Phys. IPV = Physical Intimate Partner Violence, Psych. IPV = Psychological Intimate Partner Violence.  * *p* < .05, ** *p* < .01 | | | | | | | | | | | | | | | | | | | | | | | | | | | | | | |

| Supplemental Table S2. | | | | | | | | | | | | | | | | | | | | | | | | | | | | | | |
| --- | --- | --- | --- | --- | --- | --- | --- | --- | --- | --- | --- | --- | --- | --- | --- | --- | --- | --- | --- | --- | --- | --- | --- | --- | --- | --- | --- | --- | --- | --- |
| *Pearson Correlations of Adversity Severity Ratings by Consensus Controlling for Sibling Status* | | | | | | | | | | | | | | | | | | | | | | | | | | | | | | |
| Adversity Type | 1 | | 2 | | | | 3 | 4 | | | 5 | | 6 | 7 | | | 8 | | 9 | | 10 | | 11 | | 12 | 13 | | 14 | | |
| 1. DV |  | — | |  | .64 | ** | .76 | ** | .16 | * | .17 | * | -.07 |  | .22 | * | .17 |  | .01 |  | .23 | * | .46 | ** | .10 |  | .08 |  | -.02 |  |
| 2. Psych. IPV |  |  | |  | — |  | .59 | ** | .28 | ** | .03 |  | .04 |  | .28 | ** | .30 | ** | .15 |  | .29 | ** | .27 | ** | .08 |  | .03 |  | .00 |  |
| 3. Phys. IPV |  |  | |  |  |  | — |  | .17 | * | .16 | * | .04 |  | .10 |  | .14 |  | -.02 |  | .14 |  | .43 | ** | .13 |  | .08 |  | .05 |  |
| 4. Psych. Abuse |  |  | |  |  |  |  |  | — |  | .39 | ** | .18 | * | .21 | * | .39 | ** | .15 |  | .18 | * | .13 |  | .04 |  | .11 |  | .10 |  |
| 5. Phys. Abuse |  |  | |  |  |  |  |  |  |  | — |  | .18 | * | -.01 |  | .09 |  | -.02 |  | .27 | ** | .09 |  | .17 |  | .14 |  | .16 |  |
| 6. Sex Abuse |  |  | |  |  |  |  |  |  |  |  |  | — |  | -.03 |  | .00 |  | -.01 |  | -.06 |  | -.11 |  | -.06 |  | .01 |  | .01 |  |
| 7. Neglect |  |  | |  |  |  |  |  |  |  |  |  |  |  | — |  | .17 | * | .36 | ** | .09 |  | .26 | ** | .11 |  | -.01 |  | .26 | ** |
| 8. Loss |  |  | |  |  |  |  |  |  |  |  |  |  |  |  |  | — |  | .18 | * | .04 |  | .30 | ** | .10 |  | .11 |  | .09 |  |
| 9. CG Sub. |  |  | |  |  |  |  |  |  |  |  |  |  |  |  |  |  |  | — |  | .05 |  | .13 |  | .09 |  | .03 |  | .14 |  |
| 10. Suicidality |  |  | |  |  |  |  |  |  |  |  |  |  |  |  |  |  |  |  |  | — |  | .05 |  | .03 |  | .06 |  | -.06 |  |
| 11. Criminality |  |  | |  |  |  |  |  |  |  |  |  |  |  |  |  |  |  |  |  |  |  | — |  | .11 |  | -.13 |  | -.03 |  |
| 12. CV |  |  | |  |  |  |  |  |  |  |  |  |  |  |  |  |  |  |  |  |  |  |  |  | — |  | -.04 |  | -.02 |  |
| 13. Sex Assault |  |  | |  |  |  |  |  |  |  |  |  |  |  |  |  |  |  |  |  |  |  |  |  |  |  | — |  | .07 |  |
| 14. Health |  |  | |  |  |  |  |  |  |  |  |  |  |  |  |  |  |  |  |  |  |  |  |  |  |  |  |  | — |  |
| *Note.* CG Sub. = Caregiver Substance Abuse, CV = Community Violence, DV = Domestic Violence, Health = Health-related Trauma, Phys. IPV = Physical Intimate Partner Violence, Psych. IPV = Psychological Intimate Partner Violence.  * *p* < .05, ** *p* < .01 | | | | | | | | | | | | | | | | | | | | | | | | | | | | | | |

| Supplemental Table S3. | | | | | | | | | | |
| --- | --- | --- | --- | --- | --- | --- | --- | --- | --- | --- |
| *Spearman Correlations (r*s) *of Averaged Adversity Severity Scores and Allegation Outcomes Controlling for Sibling Status* | | | | | | | | | | |
|  | Past/Index Allegations | | | | | | | | | New Allegations  Any |
| Adversity Type | PA | EA | PN | EN | SA | ED | MN | Any Sub. | Any Diff. Resp. |
| DV | .06 | .02 | .20* | .33** | -.10 | .11 | .06 | .27** | -.09 | .07 |
| Psych. IPV | -.06 | .12 | .17* | .23* | -.05 | .00 | .00 | .16 | .07 | .17* |
| Phys. IPV | .05 | -.04 | .16 | .33** | -.05 | .10 | .02 | .21* | -.05 | .12 |
| Psych. Abuse | .30** | .28** | .01 | .03 | -.01 | .03 | .21* | .08 | .01 | .03 |
| Phys. Abuse | .58** | .27** | -.03 | .09 | .08 | .06 | .21* | .22* | -.03 | -.02 |
| Sex Abuse | .04 | -.13 | .10 | -.04 | .39** | .04 | -.04 | -.06 | .03 | .05 |
| Neglect | .03 | .10 | .35** | .01 | -.06 | .20* | .19* | .27** | -.11 | .22* |
| Loss | .09 | -.09 | .13 | -.12 | -.01 | .12 | .14 | .16 | -.14 | .00 |
| CG Sub. | -.08 | .04 | .23** | .05 | -.04 | .19* | .09 | .16 | -.09 | .07 |
| Suicidality | -.05 | .09 | .12 | .13 | -.10 | .02 | .21* | .06 | -.16 | -.02 |
| Criminality | .03 | -.06 | .17* | .12 | -.04 | -.03 | .12 | .40** | -.05 | .05 |
| CV | .19* | .19* | .11 | .00 | .08 | .11 | .18* | .03 | -.01 | .05 |
| Sex Assault | .08 | .01 | .05 | -.11 | -.04 | .21* | -.02 | .05 | .06 | -.03 |
| Health | .07 | .03 | .14 | .01 | -.01 | .05 | .27** | .09 | -.11 | .12 |
| *Note.* CG Sub. = Caregiver Substance Abuse, CV = Community Violence, Diff. Resp. = Differential Response DV = Domestic Violence, EA = Emotional Abuse, ED = Educational Neglect, EN = Emotional Neglect, Health = Health-related Trauma, MN = Medical Neglect, PA = Physical Abuse, Phys. IPV = Physical Intimate Partner Violence, PN = Physical Neglect, Psych. IPV = Psychological Intimate Partner Violence, SA = Sexual Abuse, Sub. = Substantiation.  * *p* < .05, ** *p* < .01 | | | | | | | | | | |

| Supplemental Table S4. | | | | | | | | | | |
| --- | --- | --- | --- | --- | --- | --- | --- | --- | --- | --- |
| *Spearman Correlations (r*s) *of Consensus Adversity Severity Scores and Allegation Outcomes Controlling for Sibling Status* | | | | | | | | | | |
|  | Past/Index Allegations | | | | | | | | | New Allegations  Any |
| Adversity Type | PA | EA | PN | EN | SA | ED | MN | Any Sub. | Any Diff. Resp. |
| DV | .04 | .03 | .17* | .28** | -.11 | .12 | .07 | .29** | -.08 | .02 |
| Psych. IPV | -.12 | .10 | .18* | .25** | -.06 | -.02 | .02 | .21* | .04 | .17* |
| Phys. IPV | .12 | .01 | .14 | .30** | .00 | .16 | -.02 | .15* | .06 | .10 |
| Psych. Abuse | .27** | .31** | .00 | .04 | .04 | .03 | .17 | .14 | -.07 | .09 |
| Phys. Abuse | .53** | .27** | -.04 | .14 | .08 | .07 | .21 | .25* | -.06 | -.06 |
| Sex Abuse | .07 | -.13 | .10 | -.02 | .40** | .04 | -.04 | -.05 | .01 | .04 |
| Neglect | .00 | .12 | .32** | -.01 | -.02 | .15 | .20 | .33** | -.17* | .25** |
| Loss | .03 | -.06 | .09 | -.11 | -.08 | .10 | .10 | .17 | -.07 | -.11 |
| CG Sub. | -.10 | .03 | .22** | .05 | -.02 | .19* | .06 | .10 | -.04 | .04 |
| Suicidality | -.08 | .16 | .11 | .15 | -.09 | .05 | .19* | .12 | -.11 | -.14 |
| Criminality | .04 | -.05 | .19* | .12 | -.03 | .02 | .13 | .36** | .02 | -.04 |
| CV | .19* | .13 | .09 | .00 | .03 | .09 | .18* | .01 | -.06 | .11 |
| Sex Assault | -.01 | .07 | .03 | -.02 | -.03 | .29** | -.02 | .10 | .02 | -.04 |
| Health | .06 | .04 | .13 | -.01 | .00 | .00 | .22** | .10 | -.10 | .07 |
| *Note.* CG Sub. = Caregiver Substance Abuse, CV = Community Violence, Diff. Resp. = Differential Response DV = Domestic Violence, EA = Emotional Abuse, ED = Educational Neglect, EN = Emotional Neglect, Health = Health-related Trauma, MN = Medical Neglect, PA = Physical Abuse, Phys. IPV = Physical Intimate Partner Violence, PN = Physical Neglect, Psych. IPV = Psychological Intimate Partner Violence, SA = Sexual Abuse, Sub. = Substantiation.  * *p* < .05, ** *p* < .01 | | | | | | | | | | |
